# Supplementary material for: Spliceosome Database: a tool for tracking components of the spliceosome
Source: Oxford University Press journal article supplement (doi:10.1093/nar/gks999), 2012-10-30
Supplement: 1075957_Supplementary_Data.zip [file 1075957_Supplementary_Data.zip]

Archive with 1 entries (1 files):
- nar-02090-data-e-2012-File007.pdf
