# Supplementary material for: Spliceosome Database: a tool for tracking components of the spliceosome
Source: Oxford University Press journal article supplement (doi:10.1093/nar/gks999), 2012-10-30

## **SUPPLEMENTAL FIGURE LEGENDS**

Supplemental Figure 1: MySQL table *schema* structure of SpliceosomeDB. The database consists of nine tables recording attributes for the entity indicated in the table title (pink shading). Entries within a table are uniquely specified by the attribute(s) shaded in green. Attributes followed by (E) or (U) were scraped from the NCBI Entrez or UniProt databases respectively. Relationships linking tables are indicated by arrows.

Supplementary Figure 1

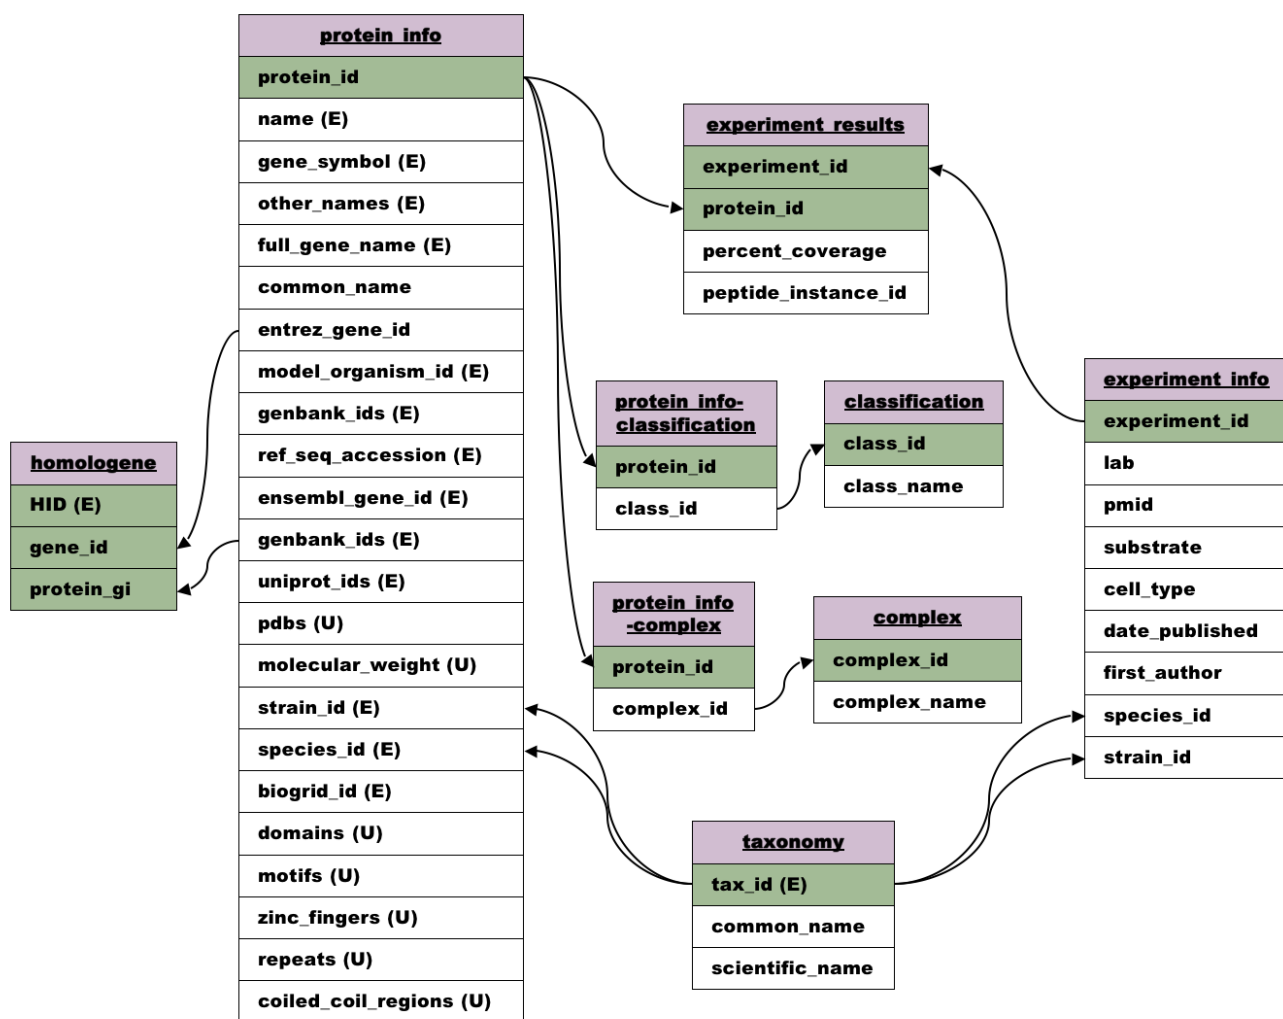

Supplement: 1075957_Supplementary_Data.zip [file 1075957_Supplementary_Data.zip › nar-02090-data-e-2012-File007.pdf]
